# Supplementary material for: Genomic analysis of the Phalaenopsis pathogen Dickeya sp. PA1, representing the emerging species Dickeya fangzhongdai
Source: PubMed Central journal article supplement (PMC6206727; doi:10.1186/s12864-018-5154-3), 2018-10-29

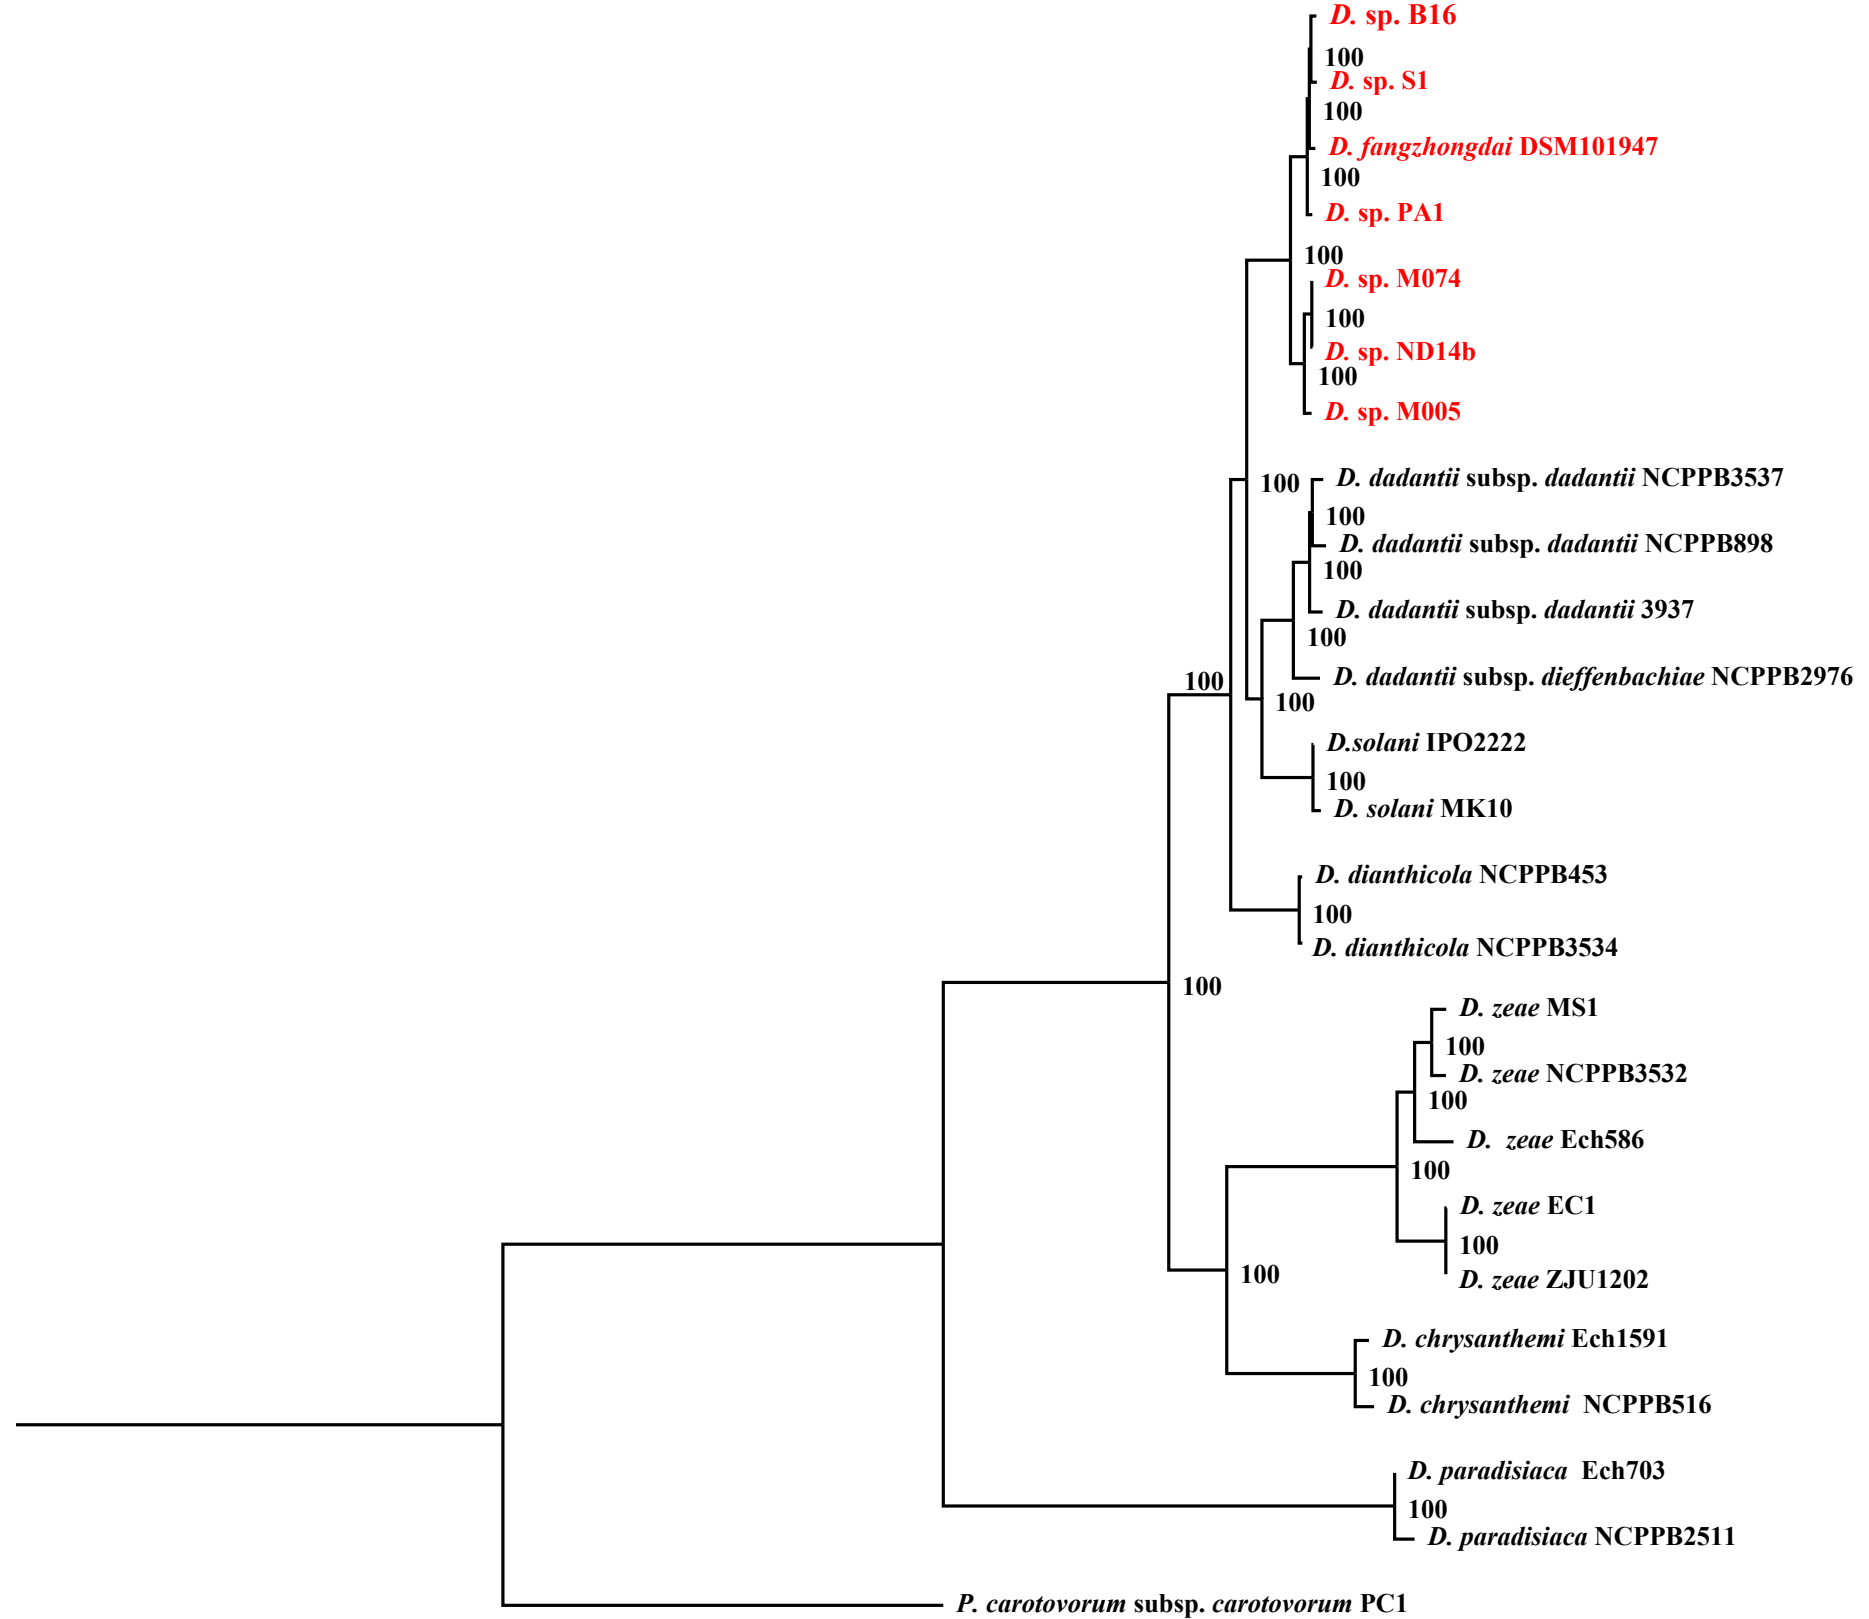

Supplement: 12864_2018_5154_MOESM1_ESM.pdf [file 12864_2018_5154_MOESM1_ESM.pdf]
